# Supplementary material for: The role of PD-1 in regulation of macrophage apoptosis and its subversion by Leishmania donovani
Source: PubMed Central journal article supplement (PMC5493582; doi:10.1038/cti.2017.12), 2017-05-05
Supplement: cti201712x1.pdf [file cti201712x1.pdf]

## Supplementary figures

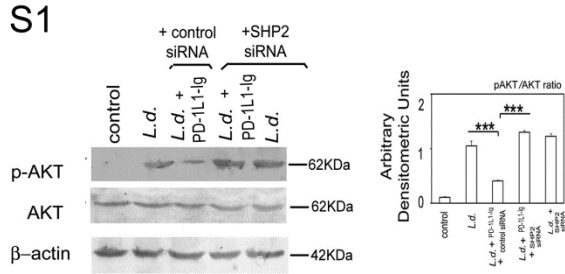

### Figure Legend S1:

SHP2 siRNA or control siRNA transfected macrophages were pre-treated with or without PD-1 agonist and infected with *L. donovani* promastigotes for 6 h. Cells were analyzed for p-AKT and AKT levels by Western blot analysis. The data shown are mean  $\pm$  S.D. of three independent experiments.  $n=3$ ,  $***p < 0.001$ ; Student's *t* test.

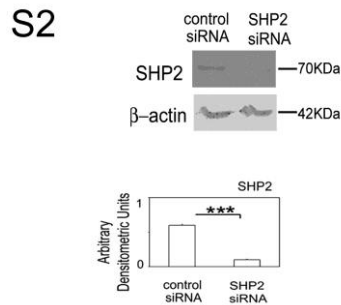

### Figure Legend S2:

Expression of SHP2 was analysed in SHP2 siRNA or control siRNA transfected macrophages by immunoblotting. The data shown are mean  $\pm$  S.D. of three independent experiments.  $n=3$ ,  $***p < 0.001$ ; Student's *t* test.

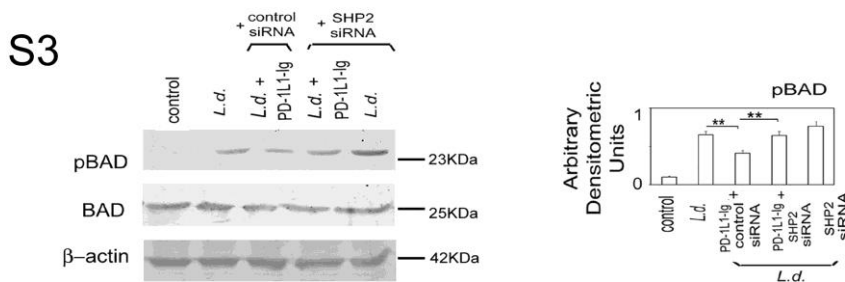

### Figure Legend S3:

SHP2 siRNA or control siRNA transfected macrophages were pre-treated with PD-1 agonist and infected with *L. donovani* promastigotes for 6 h. Cell lysates were analyzed for p-BAD and BAD. The data shown are mean  $\pm$  S.D. of three independent experiments.  $n=3$ ,  $**p < 0.01$ ;  $***p < 0.001$ ; Student's t test.

### S4

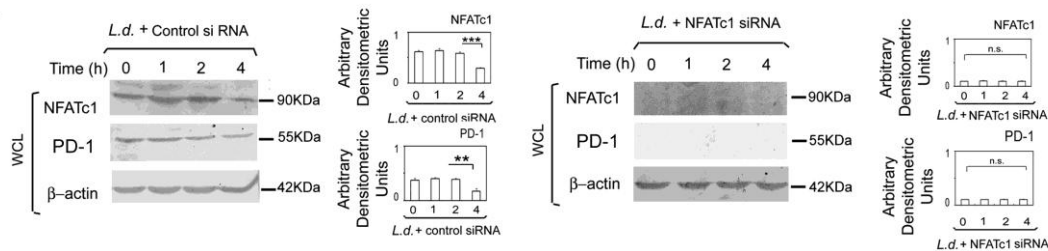

### Figure Legend S4:

NFATc1 siRNA or control siRNA transfected macrophages were infected with *L. donovani* promastigotes for indicated times and NFATc1 and PD-1 levels were analysed in whole cell lysates. The data shown are mean  $\pm$  S.D. of three independent experiments.  $n=3$ , n.s. non-significant;  $**p < 0.01$ ;  $***p < 0.001$ ; Student's t test.

### S5

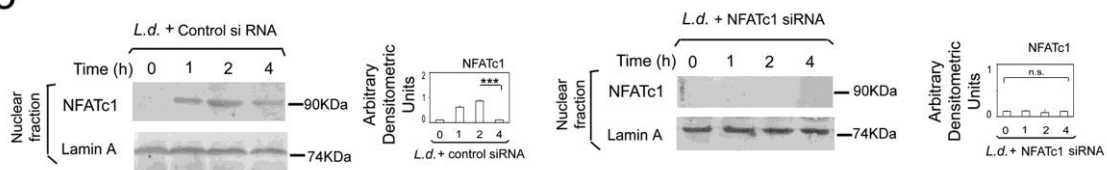

### Figure Legend S5:

NFATc1 siRNA or control siRNA transfected macrophages were infected with *L. donovani* promastigotes for indicated times. Cells were lysed, nuclear fractions were prepared and NFATc1 levels were analysed in nuclear fractions by western blotting. The data shown are mean  $\pm$  S.D. of three independent experiments.  $n=3$ , n.s. non-significant;  $***p < 0.001$ ;

Student's t test.

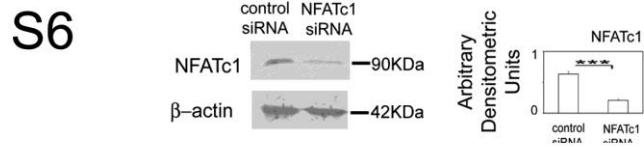

**Figure Legend S6:**

Expression of NFATc1 was analysed in NFATc1 siRNA or control siRNA transfected macrophages by immunoblotting. The data shown are mean  $\pm$  S.D. of three independent experiments. n=3, \*\*\*p < 0.001; Student's t test.
